# Supplementary material for: Photoluminescence mechanisms of BF2-formazanate dye sensitizers: a theoretical study
Source: Royal Society of Chemistry journal article supplement (doi:10.1039/d4ra02240h), 2024-01-01
Supplement: d4ra02240h1.pdf [file d4ra02240h1.pdf]

***Electronic Supplementary Information (ESI)***

***Photoluminescence mechanisms of BF<sub>2</sub>-formazanate dye sensitizers: A theoretical study***

*by*

*Parichart Suwannakham*

*Pannipa Panajapo*

*Phorntep Promma*

*Tunyawat Khrootkaew*

*Anyanee Kamkaew*

*and*

*Kritsana Sagarik\**

*School of Chemistry*

*Institute of Science*

*Suranaree University of Technology*

*Nakhon Ratchasima 30000*

*Thailand*

\*corresponding author: *kritsana@sut.ac.th*

Tel./Fax: (6681) 8783994

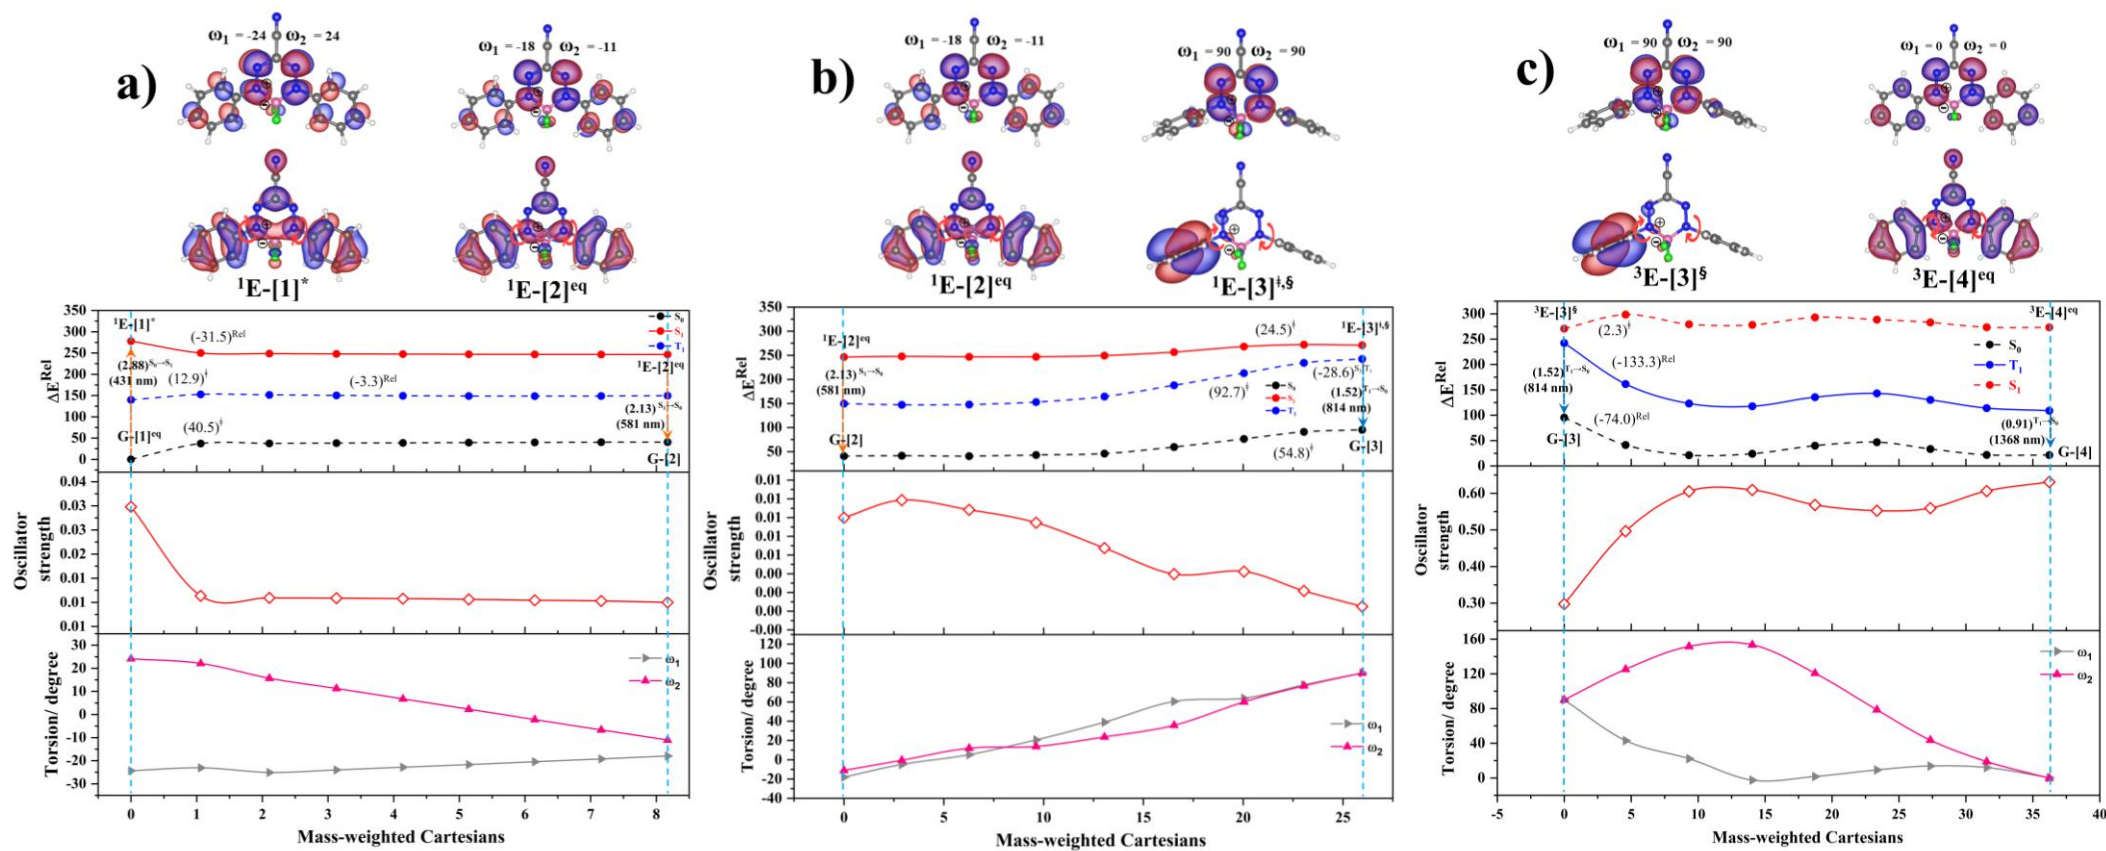

**Figure S1** Potential energy surfaces for rotational motions of  $\omega_1$  and  $\omega_2$  in  $BF_2$ -FORM, obtained based on the hypothesized pathways in Figure 4, and the DFT/B3LYP/6-311G, TD-DFT/B3LYP/6-311G, and NEB methods. Dash lines are the potential energy curves computed using the geometries on the NEB potential energy curves (solid lines). a)  $(I)^* \rightarrow (II)^*$ . b)  $(II)^* \rightleftharpoons (III)^{\ddagger, \S}$ . c)  $(III)^{\ddagger, \S} \rightarrow (IV)$ .

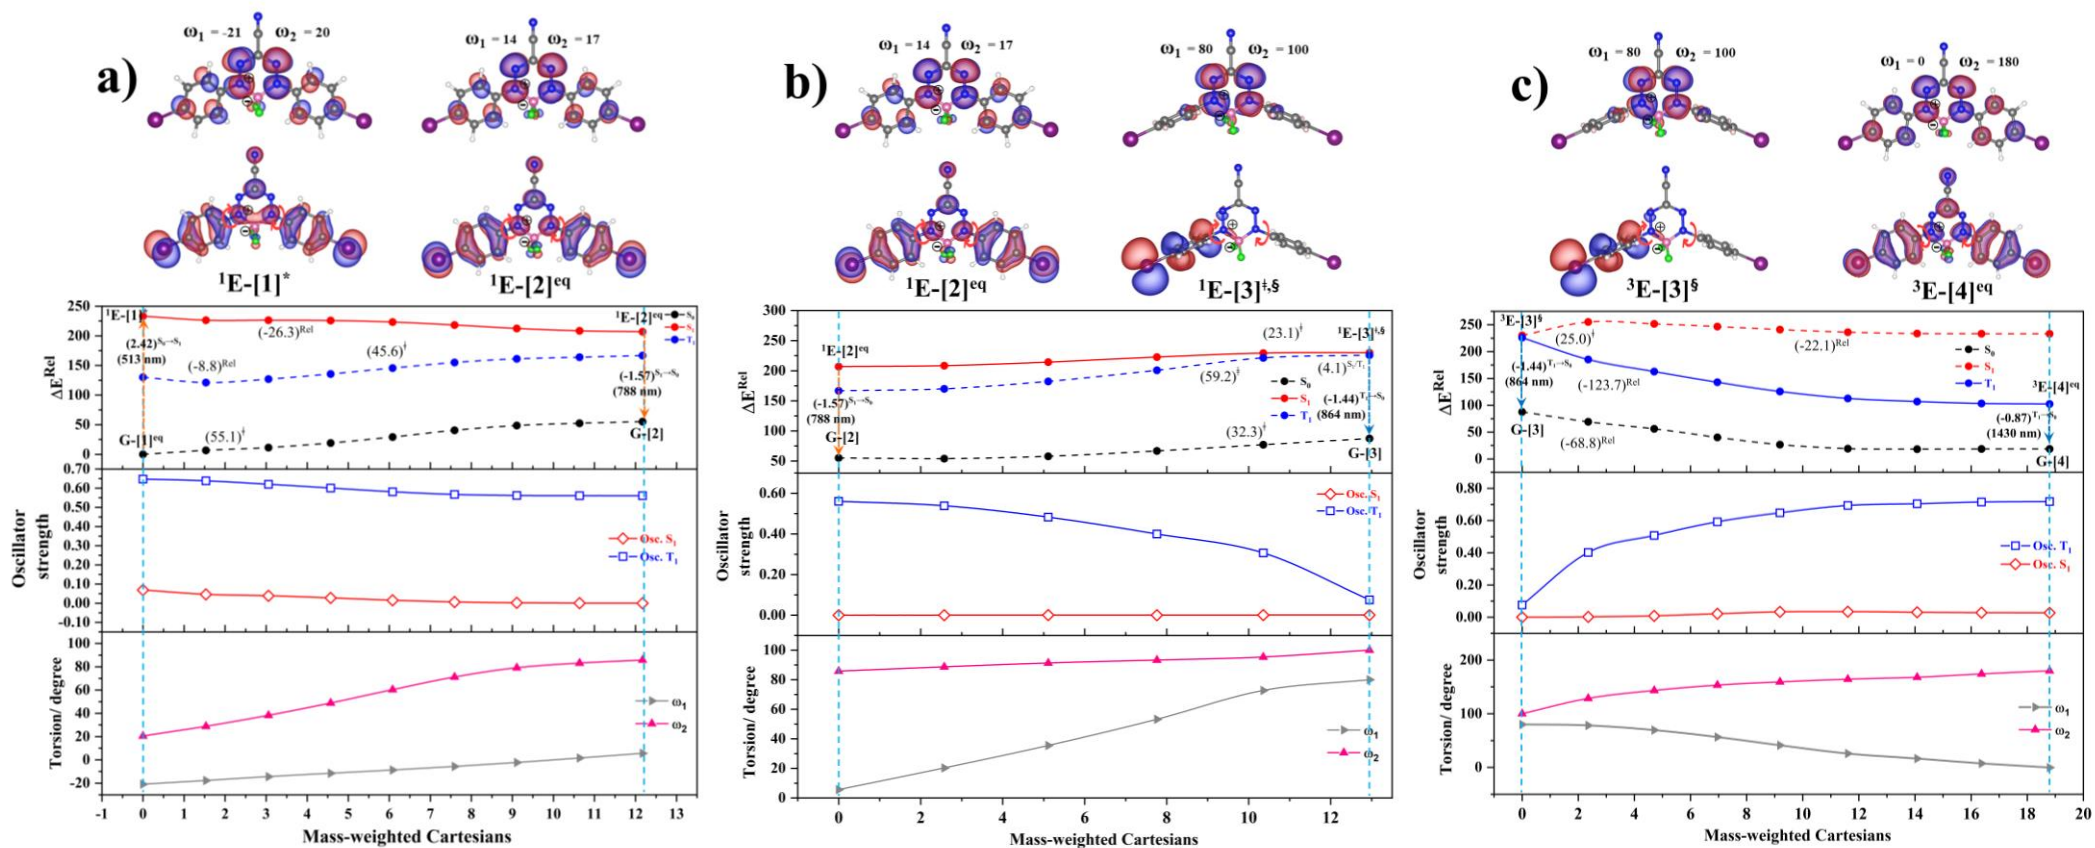

**Figure S2** Potential energy surfaces for the rotational motions of  $\omega_1$  and  $\omega_2$  in BF<sub>2</sub>-FORM-D, obtained based on the hypothesized pathways in Figure 4, and the DFT/B3LYP/6-311G, TD-DFT/B3LYP/6-311G, and NEB methods. Dash lines are the potential energy curves computed using the geometries on the NEB potential energy curves (solid lines). a) (I)<sup>\*</sup> → (II)<sup>\*</sup>. b) (II)<sup>\*</sup> ⇌ (III)<sup>‡,§</sup>. c) (III)<sup>‡,§</sup> → (IV).

**Table S1** Characteristic structures and energies of BF<sub>2</sub>-FORM in the S<sub>0</sub>, S<sub>1</sub> and T<sub>1</sub> states obtained from DFT/B3LYP/6-311G and TD-DFT/B3LYP/6-311G calculations.

| BF <sub>2</sub> -FORM                                                                                                                                                                      | TD-DFT                           |                                  |                                  |                                  | NX                                    |                                       |                                   | RICC2                                  |                                    |
|--------------------------------------------------------------------------------------------------------------------------------------------------------------------------------------------|----------------------------------|----------------------------------|----------------------------------|----------------------------------|---------------------------------------|---------------------------------------|-----------------------------------|----------------------------------------|------------------------------------|
|                                                                                                                                                                                            | $\Delta E^{S_0 \rightarrow S_1}$ | $\Delta E^{S_1 \rightarrow S_0}$ | $\Delta E^{S_1 \rightarrow T_1}$ | $\Delta E^{T_1 \rightarrow S_0}$ | $\Delta E_{NX}^{S_0 \rightarrow S_1}$ | $\Delta E_{NX}^{S_1 \rightarrow S_0}$ | $\tau_{NX}^{S_1 \rightarrow S_0}$ | $\Delta E_{SOC}^{T_1 \rightarrow S_0}$ | $\tau_{SOC}^{T_1 \rightarrow S_0}$ |
| <b>G-[1]<sup>eq</sup></b><br>$\omega_1 = -24$ $\omega_2 = 24$<br>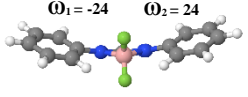<br>$E^{Tot} = -1037.31086$              | 2.88                             | -                                | -                                | -                                | 2.71                                  | -                                     | $2.95 \times 10^{-9}$             | -                                      | -                                  |
| <b><sup>1</sup>E-[2]<sup>eq</sup></b><br>$\omega_1 = -18$ $\omega_2 = -11$<br><br>$E^{Tot} = -1037.21702$ | -                                | -2.13                            | -                                | -                                | -                                     | -2.46                                 | $8.88 \times 10^{-7}$             | -                                      | -                                  |
| <b><sup>1</sup>E-[3]<sup>§</sup></b><br>$\omega_1 = 90$ $\omega_2 = 90$<br><br>$E^{Tot} = -1037.20770$    | -                                | -1.82                            | -0.30                            | -1.52 (P <sub>1</sub> )          | -                                     | -                                     | -                                 | -1.94 (P <sub>1</sub> )                | 0.36                               |
| <b><sup>3</sup>E-[4]<sup>eq</sup></b><br>$\omega_1 = 0$ $\omega_2 = 0$<br><br>$E^{Tot} = -1037.26944$   | -                                | -0.91                            | -                                | -0.91 (P <sub>2</sub> )          | -                                     | -0.91                                 | $1.13 \times 10^{-6}$             | -1.05 (P <sub>2</sub> )                | 131                                |

$E^{Tot}$  = total energy in au;  $\Delta E^{S_0 \rightarrow S_1}$  = excitation energy in eV;  $\Delta E_{NX}^{S_0 \rightarrow S_1}$  = excitation energy obtained based on 200 Wigner sampled structures;  $\omega_1$  and  $\omega_2$  = dihedral angles defined in Figure 2;  $\Delta E^{T_1 \rightarrow S_0}$  = singlet-triplet energy gap on the potential energy surface; [...] <sup>eq</sup> = equilibrium structure; [...] <sup>§</sup> = structure at the S<sub>1</sub>/T<sub>1</sub> intersection;  $\tau_{NX}^{S_1 \rightarrow S_0}$  and  $\tau_{SOC}^{T_1 \rightarrow S_0}$  = fluorescence and phosphorescence lifetimes in s, respectively;  $\Delta E_{SOC}^{T_1 \rightarrow S_0}$  = singlet-triplet energy gap obtained from SOC-PT-CC2/aug-cc-pVDZ calculations.

**Table S2** The characteristic structures and energies of BF<sub>2</sub>-FORM-D in the S<sub>0</sub>, S<sub>1</sub> and T<sub>1</sub> states obtained from DFT/B3LYP/6-311G and TD-DFT/B3LYP/6-311G calculations.

| BF <sub>2</sub> -FORM-D                                                                                                                                                                         | TD-DFT                           |                                  |                                  |                                  | NX                                           |                                              |                                          | RICC2                                         |                                           |
|-------------------------------------------------------------------------------------------------------------------------------------------------------------------------------------------------|----------------------------------|----------------------------------|----------------------------------|----------------------------------|----------------------------------------------|----------------------------------------------|------------------------------------------|-----------------------------------------------|-------------------------------------------|
|                                                                                                                                                                                                 | $\Delta E^{S_0 \rightarrow S_1}$ | $\Delta E^{S_1 \rightarrow S_0}$ | $\Delta E^{S_1 \rightarrow T_1}$ | $\Delta E^{T_1 \rightarrow S_0}$ | $\Delta E_{\text{NX}}^{S_0 \rightarrow S_1}$ | $\Delta E_{\text{NX}}^{S_1 \rightarrow S_0}$ | $\tau_{\text{NX}}^{S_1 \rightarrow S_0}$ | $\Delta E_{\text{SOC}}^{T_1 \rightarrow S_0}$ | $\tau_{\text{SOC}}^{T_1 \rightarrow S_0}$ |
| <b>G-[1]<sup>eq</sup></b><br>$\omega_1 = -21$ $\omega_2 = 21$<br>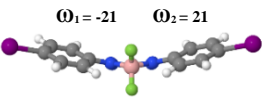<br>$E^{\text{Tot}} = -1058.87541$            | 2.42                             | -                                | -                                | -                                | 2.32                                         | -                                            | $3.94 \times 10^{-9}$                    | -                                             | -                                         |
| <b><sup>1</sup>E-[2]<sup>eq</sup></b><br>$\omega_1 = 5$ $\omega_2 = 86$<br><br>$E^{\text{Tot}} = -1058.79661$  | -                                | -1.57                            | -                                | -                                | -                                            | -1.65                                        | $8.49 \times 10^{-7}$                    | -                                             | -                                         |
| <b><sup>1</sup>E-[3]<sup>§</sup></b><br>$\omega_1 = 80$ $\omega_2 = 100$<br><br>$E^{\text{Tot}} = -1058.78779$ | -                                | -1.48                            | -0.04                            | -1.43 (P <sub>1</sub> )          | -                                            | -                                            | -                                        | -1.93 (P <sub>1</sub> )                       | 0.33                                      |
| <b><sup>3</sup>E-[4]<sup>eq</sup></b><br>$\omega_1 = 0$ $\omega_2 = 0$<br><br>$E^{\text{Tot}} = -1058.83644$ | -                                | -0.88                            | -                                | -0.87 (P <sub>2</sub> )          | -                                            | -0.94                                        | $5.20 \times 10^{-8}$                    | -0.98 (P <sub>2</sub> )                       | 194                                       |

$E^{\text{Tot}}$  = total energy in au;  $\Delta E^{S_0 \rightarrow S_1}$  = excitation energy in eV;  $\Delta E_{\text{NX}}^{S_0 \rightarrow S_1}$  = excitation energy obtained based on 200 Wigner sampled structures;  $\omega_1$  and  $\omega_2$  = dihedral angles defined in Figure 2;  $\Delta E^{T_1 \rightarrow S_0}$  = singlet-triplet energy gap on the potential energy surface; [...] <sup>eq</sup> = equilibrium structure; [...] <sup>§</sup> = structure at the S<sub>1</sub>/T<sub>1</sub> intersection;  $\tau_{\text{NX}}^{S_1 \rightarrow S_0}$  and  $\tau_{\text{SOC}}^{T_1 \rightarrow S_0}$  = fluorescence and phosphorescence lifetimes in s, respectively;  $\Delta E_{\text{SOC}}^{T_1 \rightarrow S_0}$  = singlet-triplet energy gap obtained from SOC-PT-CC2/aug-cc-pVDZ calculations.

**Table S3** Thermodynamics and kinetics of the photoluminescence pathway (Figure 4) for BF<sub>2</sub>-FORM. Rate constants, temperatures and energies are in s<sup>-1</sup>, K and kJ/mol, respectively;  $\Delta E^\ddagger$  = energy barrier;  $\Delta E^{\ddagger, \text{ZPC}}$  = zero-point energy-corrected barrier, obtained by including the zero-point correction energy to the energy barrier obtained from the NEB method ( $\Delta E^\ddagger$ );  $\Delta H^\ddagger$  = activation enthalpy;  $\Delta S^\ddagger$  = activation entropy;  $\Delta G^\ddagger$  = activation Gibbs free energies;  $T_c$  = crossover temperature;  $T$  = temperature;  $k_{f/r}^{\text{Q-vib}}$  = rate constant obtained with quantized vibrations including the zero-point vibrational energy; f/r = forward or reverse direction.

**Table S3**

| Reaction Pathway                                     | $\Delta E^\ddagger$ | $\Delta E^{\ddagger,ZPC}$ | $\Delta H^\ddagger$ | $T_c$ | T   | $k_{f/r}^{Q-vib}$      | $\Delta G^\ddagger$ | $\Delta S^\ddagger$    |
|------------------------------------------------------|---------------------|---------------------------|---------------------|-------|-----|------------------------|---------------------|------------------------|
| ${}^1E-[1]^* \leftarrow {}^1E-[2]^{eq}$              | 31.5                | 20.3                      | 23.8                | 372   | 300 | $3.24 \times 10^9$     | 18.87               | $1.63 \times 10^{-2}$  |
|                                                      |                     |                           |                     |       | 330 | $7.51 \times 10^9$     | 18.71               | $1.53 \times 10^{-2}$  |
|                                                      |                     |                           |                     |       | 413 | $4.18 \times 10^{10}$  | 18.27               | $1.34 \times 10^{-2}$  |
|                                                      |                     |                           |                     |       | 550 | $2.47 \times 10^{11}$  | 17.55               | $1.13 \times 10^{-2}$  |
| ${}^1E-[2]^{eq} \rightarrow {}^1E-[3]^{\ddagger,\S}$ | 24.4                | 20.7                      | 21.8                | 5     | 300 | $5.85 \times 10^8$     | 23.14               | $-4.51 \times 10^{-3}$ |
|                                                      |                     |                           |                     |       | 330 | $1.29 \times 10^9$     | 23.55               | $-5.36 \times 10^{-3}$ |
|                                                      |                     |                           |                     |       | 413 | $6.27 \times 10^9$     | 24.78               | $-7.25 \times 10^{-3}$ |
|                                                      |                     |                           |                     |       | 550 | $3.10 \times 10^{10}$  | 27.03               | $-9.54 \times 10^{-3}$ |
| ${}^3E-[3]^\S \leftarrow {}^3E-[4]^{eq}$             | 133.3               | 127.1                     | 129.3               | 42    | 300 | $5.26 \times 10^{-10}$ | 126.78              | $8.40 \times 10^{-3}$  |
|                                                      |                     |                           |                     |       | 330 | $5.79 \times 10^{-8}$  | 126.82              | $7.51 \times 10^{-3}$  |
|                                                      |                     |                           |                     |       | 413 | $7.13 \times 10^{-4}$  | 126.99              | $5.60 \times 10^{-3}$  |
|                                                      |                     |                           |                     |       | 550 | $9.03 \times 10^0$     | 127.45              | $3.38 \times 10^{-3}$  |

**Table S4** Thermodynamics and kinetics of the photoluminescence pathway (Figure 4) for BF<sub>2</sub>-FORM-D. Rate constants, temperatures and energies are in s<sup>-1</sup>, K and kJ/mol, respectively;  $\Delta E^\ddagger$  = energy barrier;  $\Delta E^{\ddagger, \text{ZPC}}$  = zero-point energy-corrected barrier, obtained by including the zero-point correction energy to the energy barrier obtained from the NEB method ( $\Delta E^\ddagger$ );  $\Delta H^\ddagger$  = activation enthalpy;  $\Delta S^\ddagger$  = activation entropy;  $\Delta G^\ddagger$  = activation Gibbs free energies;  $T_c$  = crossover temperature;  $T$  = temperature;  $k_{f/r}^{\text{Q-vib}}$  = rate constant obtained with quantized vibrations including the zero-point vibrational energy; f/r = forward or reverse direction.



**Table S4**

| Reaction Pathway                                     | $\Delta E^\ddagger$ | $\Delta E^{\ddagger,ZPC}$ | $\Delta H^\ddagger$ | $T_c$ | T   | $k_{f/r}^{Q-vib}$     | $\Delta G^\ddagger$ | $\Delta S^\ddagger$    |
|------------------------------------------------------|---------------------|---------------------------|---------------------|-------|-----|-----------------------|---------------------|------------------------|
| ${}^1E-[1]^* \leftarrow {}^1E-[2]^{eq}$              | 26.3                | 32.9                      | 30.4                | 4     | 300 | $2.26 \times 10^4$    | 48.49               | $-6.03 \times 10^{-2}$ |
|                                                      |                     |                           |                     |       | 330 | $6.92 \times 10^4$    | 50.52               | $-6.10 \times 10^{-2}$ |
|                                                      |                     |                           |                     |       | 413 | $6.40 \times 10^5$    | 56.29               | $-6.28 \times 10^{-2}$ |
|                                                      |                     |                           |                     |       | 550 | $5.74 \times 10^6$    | 66.34               | $-6.53 \times 10^{-2}$ |
| ${}^1E-[2]^{eq} \rightarrow {}^1E-[3]^{\ddagger,\S}$ | 23.1                | 30.0                      | 26.9                | 4     | 300 | $2.45 \times 10^4$    | 48.29               | $-7.12 \times 10^{-2}$ |
|                                                      |                     |                           |                     |       | 330 | $6.64 \times 10^4$    | 50.64               | $-7.18 \times 10^{-2}$ |
|                                                      |                     |                           |                     |       | 413 | $4.78 \times 10^5$    | 57.29               | $-7.36 \times 10^{-2}$ |
|                                                      |                     |                           |                     |       | 550 | $3.31 \times 10^6$    | 68.86               | $-7.62 \times 10^{-2}$ |
| ${}^3E-[3]^\S \leftarrow {}^3E-[4]^{eq}$             | 123.7               | 118.7                     | 120.7               | 134   | 300 | $1.08 \times 10^{-8}$ | 119.25              | $4.74 \times 10^{-3}$  |
|                                                      |                     |                           |                     |       | 330 | $8.68 \times 10^{-7}$ | 119.40              | $3.87 \times 10^{-3}$  |
|                                                      |                     |                           |                     |       | 413 | $5.70 \times 10^{-3}$ | 120.86              | $1.97 \times 10^{-3}$  |
|                                                      |                     |                           |                     |       | 550 | $3.84 \times 10^1$    | 120.83              | $-2.81 \times 10^{-4}$ |
